# Supplementary material
Source: HighWire-hosted journal article supplement (https://drc.bmj.com/content/4/1/e000239)
Supplement: inline-supplementary-material-1 [file inline-supplementary-material-1.pdf]

# American Diabetes Association | Manuscript Submission Form

Please complete this form and upload it with your submission. Questions regarding this form or its contents should be sent to the Editorial Office at [EditorialOffice@diabetes.org](mailto:EditorialOffice@diabetes.org).

Journal:

Manuscript #:  Title:

Author List:

## 1. Statement of Originality and Authorship

- We have read and understand the policies and procedures outlined in the journal's online instructions for authors. We approve the submission of this manuscript to the American Diabetes Association (ADA) for publication and have taken due care to ensure the integrity of this work.
- We attest that each author has made an important scientific contribution to the study and has assisted with the drafting or revising of the manuscript, in accordance with the definition of an author as stated by the International Committee of Medical Journal Editors (ICMJE) at <http://www.icmje.org/recommendations/>. The contributions of each individual Author are described in the manuscript.
- We confirm that neither the manuscript nor any part of it has been published or is under consideration for publication elsewhere (abstracts excluded). Any reference to or use of previously published material protected by copyright is explicitly acknowledged in the manuscript. Posting of submitted material on a Web site may be considered prior publication and should be noted in the comments to the editor upon submission.

## 2. Potential Conflict of Interest Disclosure

- We confirm that potential conflicts of interest for all Authors, or acknowledgment that no conflicts exist, are included in the manuscript's Acknowledgments section. Disclosures include relationships with a company whose products or services are related to the subject matter of the manuscript. Company is defined as a for-profit concern engaged in the development, manufacture, or sale of pharmaceutical or biomedical devices or supplies. Please refer to the "Publications Policies and Procedures" document on the journal's online instructions for authors for examples of relevant duality of interest.

## 3. Copyright Assignment Agreement (select one)

- We hereby assign all rights, including but not limited to the copyright, for this manuscript to ADA upon its acceptance for publication. The rights assigned include, but are not limited to, the sole and exclusive rights to license, sell, subsequently assign, derive, distribute, display, and reproduce this manuscript, in whole or in part, in any format, electronic or otherwise, including formats not in existence at the time this agreement was signed. The Authors hereby warrant that they have not granted or assigned, and shall not grant or assign, the aforementioned rights to any other person, firm, organization, or other entity.

**Reuse.** Authors are permitted to reuse portions of their ADA-copyrighted work, including tables and figures, in their own work, and to reuse portions or all of their ADA-copyrighted work for educational purposes, provided that the proper citation and copyright information is given.

**Post-prints.** Authors are permitted to submit the final, *accepted version of their manuscript* to their funding body, such as NIH, or institution for inclusion in their funding body or institution's database, archive, or repository, or to post the final, accepted version on their personal Web site. These manuscripts may be made freely accessible to the public upon acceptance. See the journal's online instructions for authors for more information.

## Work Made for Hire

- This work was produced for an employer as a "work made for hire." An authorized representative of that employer must sign here to indicate copyright assignment on behalf of the authors. The employer of the author(s) is permitted to transmit the work on an internal, secure network for use by its employees only, provided that such use is for the promotion of its business enterprise and does not imply endorsement by ADA.

## Authorized Representative:

## Government Employee

- This work was produced by an employee of the United States Government as part of his/her official duties. No copyright exists, and therefore it cannot be transferred.

The Authors agree to the terms outlined in this document and have provided consent to authorize the Corresponding Author to act on behalf of all Authors and enter into this agreement,

Electronically signed for and on behalf of the Authors:

Date:
